# Supplementary material for: Enhancement of Magnetic Surface-Enhanced Raman Scattering Detection by Tailoring Fe3O4@Au Nanorod Shell Thickness and Its Application in the On-site Detection of Antibiotics in Water
Source: PubMed Central journal article supplement — ACS Omega. 2022 Nov 29;7(49):45493–503. doi: 10.1021/acsomega.2c06099 (PMC9753213; doi:10.1021/acsomega.2c06099), 2022-11-29
Supplement: ao2c06099_si_001.pdf [file ao2c06099_si_001.pdf]

## Supporting Information

# Enhancement of Magnetic Surface-Enhanced Raman Scattering Detection by Tailoring Fe<sub>3</sub>O<sub>4</sub>@Au Nanorod Shell Thickness and its Application in the On-site Detection of Antibiotics in Water

*Leixuri B. Berganza,<sup>1</sup> Lucio Litti,<sup>2\*</sup> Moreno Meneghetti,<sup>2</sup> Senentxu Lanceros-Méndez,<sup>1,3</sup>*

*Javier Reguera,<sup>1\*</sup>*

<sup>1</sup>BCMaterials, Basque Center for Materials, Applications, and Nanostructures, UPV/EHU  
Science Park, Leioa 48940, Spain.

<sup>2</sup>Nanostructures and Optics Laboratory, Department of Chemical Sciences, University of  
Padova, Via Marzolo, 1, 35131 Padova, Italy.

<sup>3</sup>Ikerbasque Basque Foundation for Science Bilbao 48009, Spain.

*J. Reguera:* [javier.reguera@bcmaterials.net](mailto:javier.reguera@bcmaterials.net); *L. Litti:* [lucio.litti@unipd.it](mailto:lucio.litti@unipd.it)

KEYWORDS: Nanorod, plasmonic, magnetic, SERS, antibiotics, portable Raman,  
Ciprofloxacin

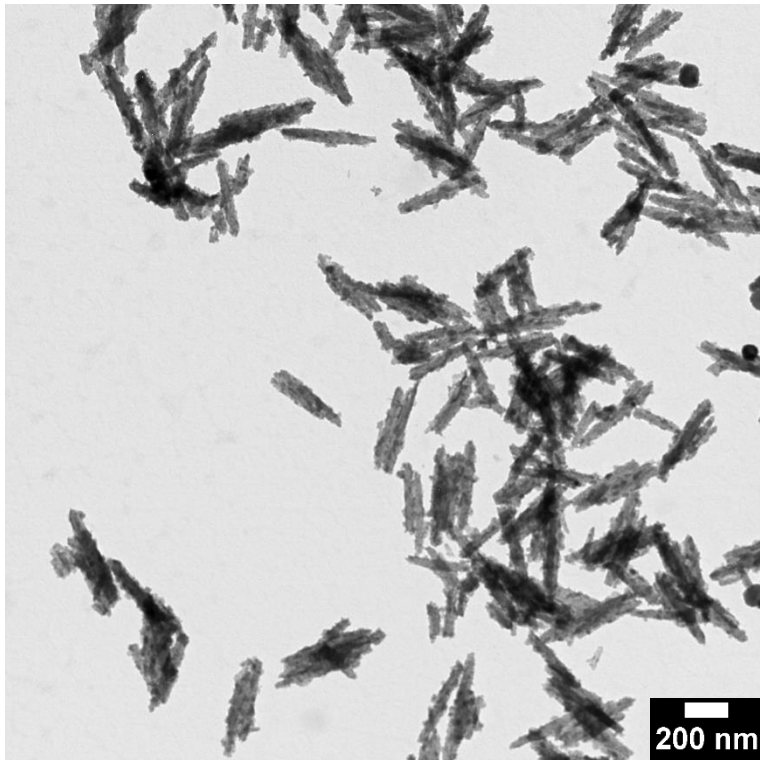

**Figure S1.** Low magnification TEM image of Fe<sub>3</sub>O<sub>4</sub>-NR: Au core-satellite nanoparticles used as seed for further Au growth.

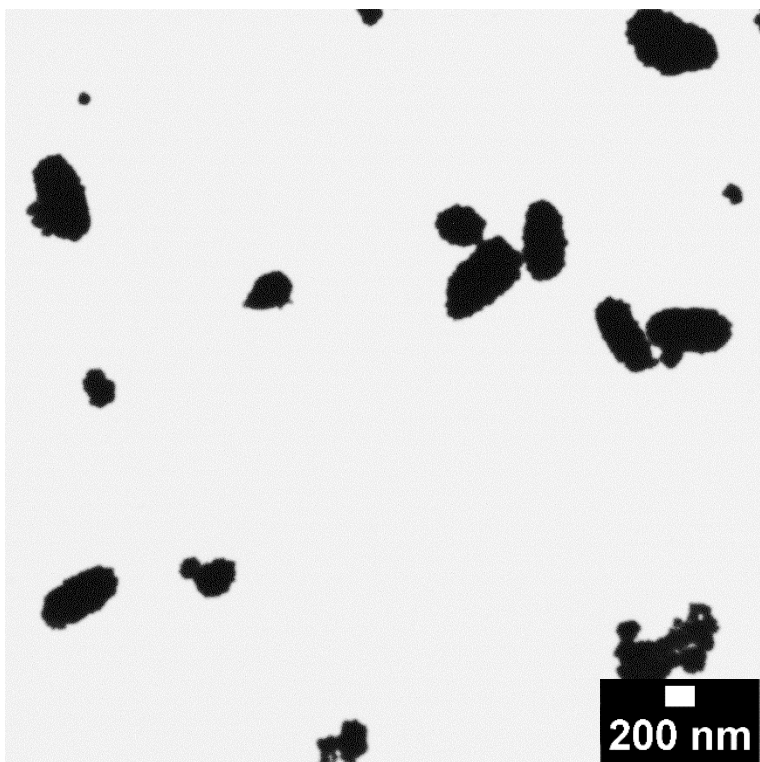

**Figure S2.** Low magnification TEM image of Au coated nanorods corresponding to sample NR@Au1.

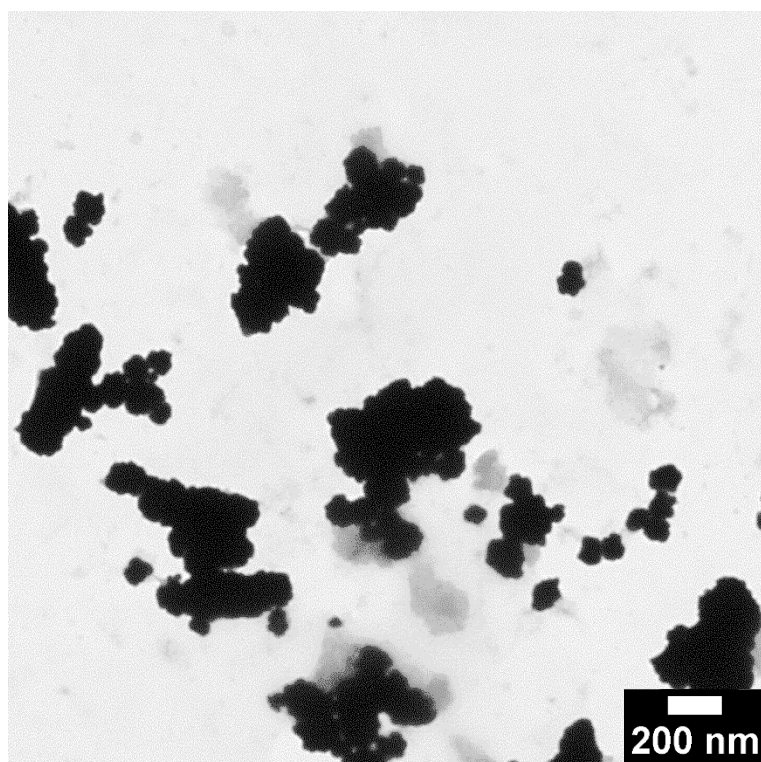

**Figure S3.** Low magnification TEM image of Au coated nanorods corresponding to sample NR@Au2.

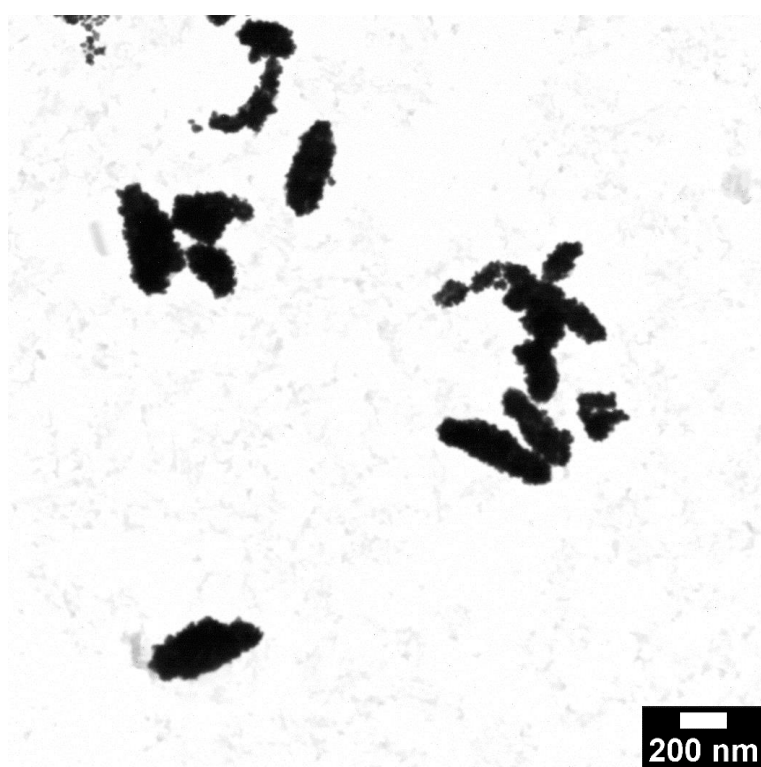

**Figure S4.** Low magnification TEM image of Au coated nanorods corresponding to sample NR@Au3.

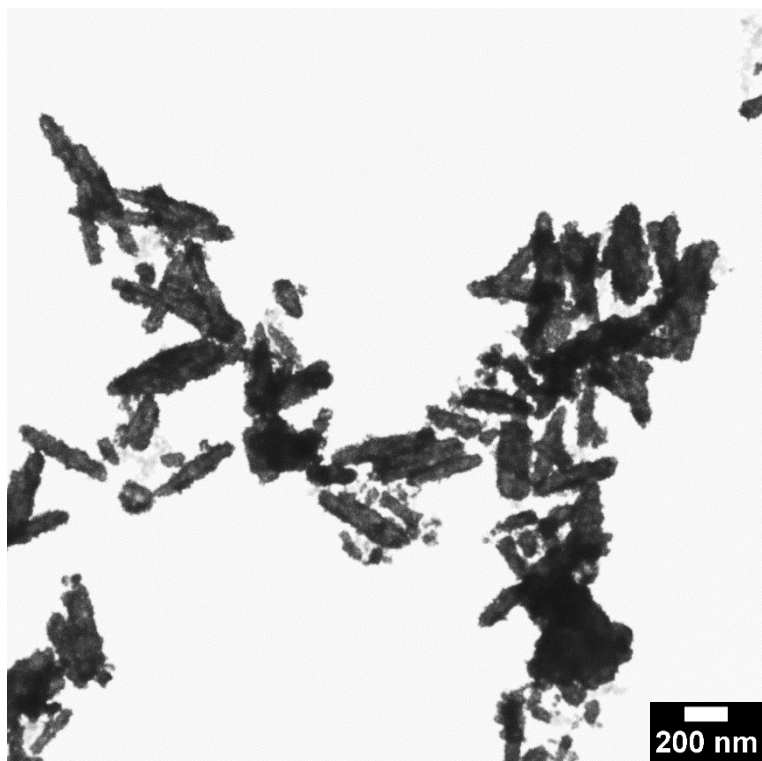

**Figure S5.** Low magnification TEM image of Au coated nanorods corresponding to sample NR@Au4.

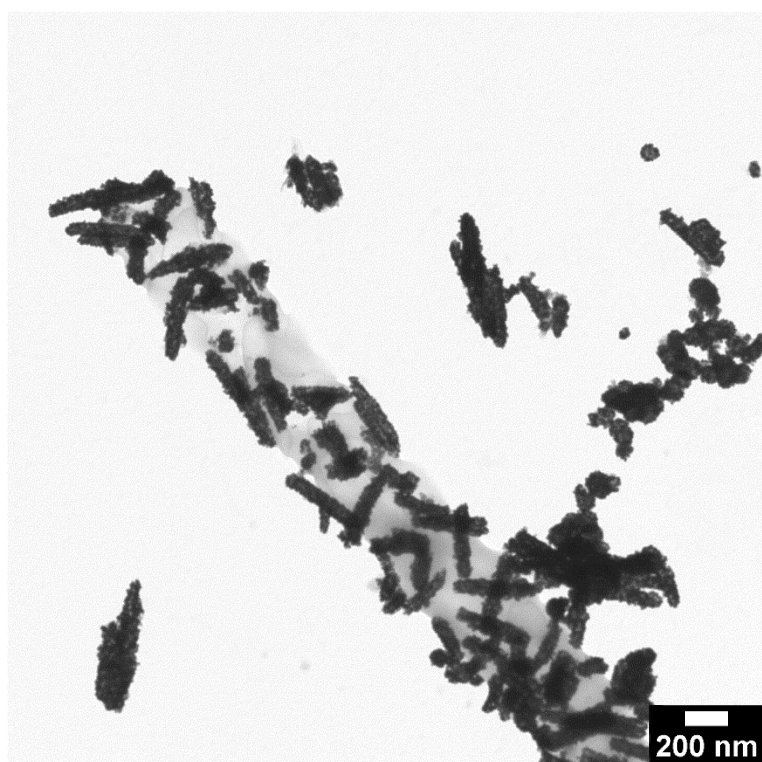

**Figure S6.** Low magnification TEM image of Au coated nanorods corresponding to sample NR@Au5.

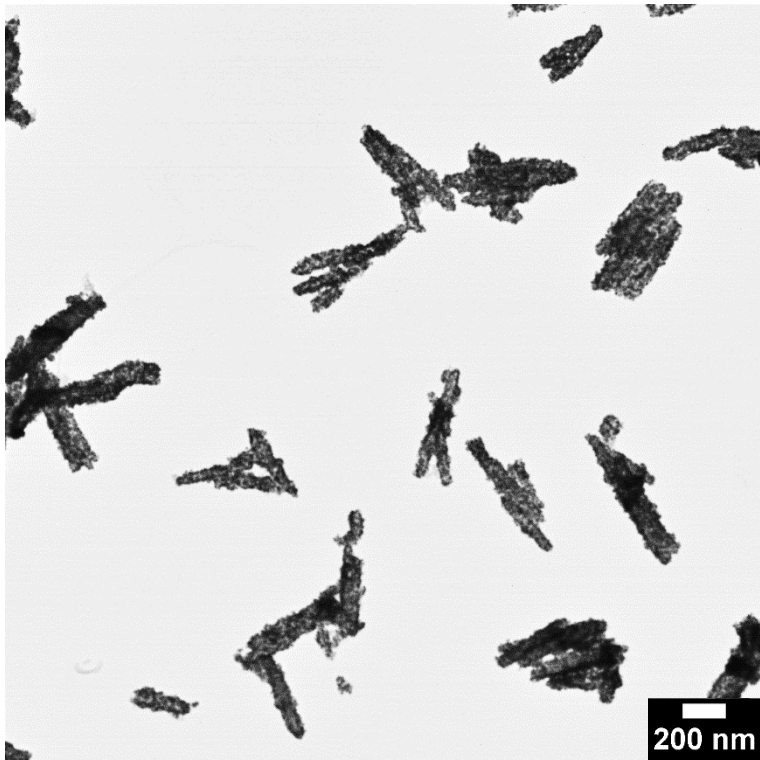

**Figure S7.** Low magnification TEM image of Au coated nanorods corresponding to sample NR@Au6
